# Supplementary material for: The Next Frontier in Tuberculosis Investigation: Automated Whole Genome Sequencing for Mycobacterium tuberculosis Analysis
Source: Preprints.org preprint supplement (doi:10.20944/preprints202406.1122.v1), 2024-06-17
Supplement: Supplementary file 1 [file supplementary]

## Sheet: Table S1 NSPHL
.	NSPHL-Strain-10-1	NSPHL-Strain-11-1	NSPHL-Strain-12-1	NSPHL-Strain-12-2	NSPHL-Strain-12-3	NSPHL-Strain-13-1	NSPHL-Strain-14-1	NSPHL-Strain-15-1	NSPHL-Strain-16-2	NSPHL-Strain-17-1	NSPHL-Strain-17-2	NSPHL-Strain-17-3	NSPHL-Strain-8-1	NSPHL-Strain-8-2	NSPHL-Strain-8-3	NSPHL-Strain-8-4	NSPHL-Strain-9-1
NSPHL-Strain-10-1	-	641	577	555	618	1979	1323	872	1792	229	232	223	1919	1898	1910	1978	2000
NSPHL-Strain-11-1	641	-	440	421	477	2027	1338	895	1797	634	647	644	1936	1916	1935	2035	2035
NSPHL-Strain-12-1	577	440	-	-	-	1833	1206	785	1662	566	578	575	1777	1763	1780	1832	1856
NSPHL-Strain-12-2	555	421	-	-	-	1800	1173	762	1632	544	553	551	1742	1729	1744	1795	1822
NSPHL-Strain-12-3	618	477	-	-	-	1977	1313	846	1766	600	615	614	1901	1877	1895	1978	1992
NSPHL-Strain-13-1	1979	2027	1833	1800	1977	-	2124	2040	131	1949	1971	1966	174	170	173	181	295
NSPHL-Strain-14-1	1323	1338	1206	1173	1313	2124	-	1380	1896	1284	1304	1301	2039	2022	2041	2130	2148
NSPHL-Strain-15-1	872	895	785	762	846	2040	1380	-	1812	846	864	856	1956	1930	1952	2042	2059
NSPHL-Strain-16-2	1792	1797	1662	1632	1766	131	1896	1812	-	1765	1779	1777	148	147	148	147	256
NSPHL-Strain-17-1	229	634	566	544	600	1949	1284	846	1765	-	-	-	1888	1875	1887	1948	1972
NSPHL-Strain-17-2	232	647	578	553	615	1971	1304	864	1779	-	-	-	1907	1895	1906	1971	1996
NSPHL-Strain-17-3	223	644	575	551	614	1966	1301	856	1777	-	-	-	1903	1891	1901	1966	1992
NSPHL-Strain-8-1	1919	1936	1777	1742	1901	174	2039	1956	148	1888	1907	1903	-	-	-	-	258
NSPHL-Strain-8-2	1898	1916	1763	1729	1877	170	2022	1930	147	1875	1895	1891	-	-	-	-	255
NSPHL-Strain-8-3	1910	1935	1780	1744	1895	173	2041	1952	148	1887	1906	1901	-	-	-	-	257
NSPHL-Strain-8-4	1978	2035	1832	1795	1978	181	2130	2042	147	1948	1971	1966	-	-	-	-	269
NSPHL-Strain-9-1	2000	2035	1856	1822	1992	295	2148	2059	256	1972	1996	1992	258	255	257	269	-

## Sheet: Table S2 SFPHL
.	36359772	36360342	36360344	36360347	36360353	36360355	36360361	36360364	36360369	36360376	36360377	36360388	Z008267	Z008268	Z008270	Z008271	Z008272	Z008273	Z008274	Z008275	Z008276	Z008277	Z008278	Z008279
36359772	-	1880	-	1176	1245	1079	1864	1904	1228	1222	1993	1235	-	221	1237	1993	224	1991	1921	209	215	1984	2002	1230
36360342	1880	-	1823	1740	1848	1629	-	-	1833	1831	934	1837	1752	1922	1829	948	1905	948	160	1904	1898	192	195	1830
36360344	-	1823	-	1142	1194	1051	1825	1847	1184	1178	1921	1181	-	213	1180	1923	217	1924	1866	203	210	1921	1927	1174
36360347	1176	1740	1142	-	804	719	1726	1760	807	798	1833	-	1064	1196	5	1833	1186	1839	1788	1188	1191	1837	1852	173
36360353	1245	1848	1194	804	-	-	1821	1869	-	2	1962	858	1143	1261	857	1958	1250	1959	1889	1264	1264	1946	1961	855
36360355	1079	1629	1051	719	-	-	1616	1644	-	3	1720	754	995	1100	757	1717	1084	1720	1657	1095	1098	1697	1708	743
36360361	1864	-	1825	1726	1821	1616	-	2	1815	1809	920	1813	1734	1898	1801	933	1876	938	157	1881	1882	195	196	1803
36360364	1904	-	1847	1760	1869	1644	2	-	1855	1852	942	1861	1773	1944	1855	953	1920	955	161	1929	1922	199	200	1857
36360369	1228	1833	1184	807	-	-	1815	1855	-	3	1937	852	1127	1241	854	1934	1231	1937	1872	1244	1245	1930	1943	843
36360376	1222	1831	1178	798	2	3	1809	1852	3	-	1937	848	1124	1238	846	1932	1234	1939	1863	1240	1242	1921	1935	838
36360377	1993	934	1921	1833	1962	1720	920	942	1937	1937	-	1958	1864	2042	1953	134	2013	357	955	2029	2016	1004	1009	1946
36360388	1235	1837	1181	-	858	754	1813	1861	852	848	1958	-	1125	1262	5	1953	1253	1952	1892	1259	1249	1970	1995	192
Z008267	-	1752	-	1064	1143	995	1734	1773	1127	1124	1864	1125	-	210	1129	1870	208	1866	1799	192	200	1857	1871	1130
Z008268	221	1922	213	1196	1261	1100	1898	1944	1241	1238	2042	1262	210	-	1270	2047	218	2037	1975	232	242	2044	2056	1268
Z008270	1237	1829	1180	5	857	757	1801	1855	854	846	1953	5	1129	1270	-	1951	1263	1950	1892	1264	1257	1968	1991	194
Z008271	1993	948	1923	1833	1958	1717	933	953	1934	1932	134	1953	1870	2047	1951	-	2022	360	967	2038	2020	1017	1022	1949
Z008272	224	1905	217	1186	1250	1084	1876	1920	1231	1234	2013	1253	208	218	1263	2022	-	2013	1957	228	241	2012	2028	1258
Z008273	1991	948	1924	1839	1959	1720	938	955	1937	1939	357	1952	1866	2037	1950	360	2013	-	971	2028	2015	1016	1019	1950
Z008274	1921	160	1866	1788	1889	1657	157	161	1872	1863	955	1892	1799	1975	1892	967	1957	971	-	1964	1952	214	216	1891
Z008275	209	1904	203	1188	1264	1095	1881	1929	1244	1240	2029	1259	192	232	1264	2038	228	2028	1964	-	224	2030	2048	1258
Z008276	215	1898	210	1191	1264	1098	1882	1922	1245	1242	2016	1249	200	242	1257	2020	241	2015	1952	224	-	2017	2031	1256
Z008277	1984	192	1921	1837	1946	1697	195	199	1930	1921	1004	1970	1857	2044	1968	1017	2012	1016	214	2030	2017	-	1	1951
Z008278	2002	195	1927	1852	1961	1708	196	200	1943	1935	1009	1995	1871	2056	1991	1022	2028	1019	216	2048	2031	1	-	1972
Z008279	1230	1830	1174	173	855	743	1803	1857	843	838	1946	192	1130	1268	194	1949	1258	1950	1891	1258	1256	1951	1972	-
